# Supplementary material for: What Are the Key Workplace Influences on Pathways of Work Ability? A Six-Year Follow Up
Source: MDPI journal article supplement (doi:10.3390/ijerph16132363), 2019-07-03
Supplement: s1 [file s1]

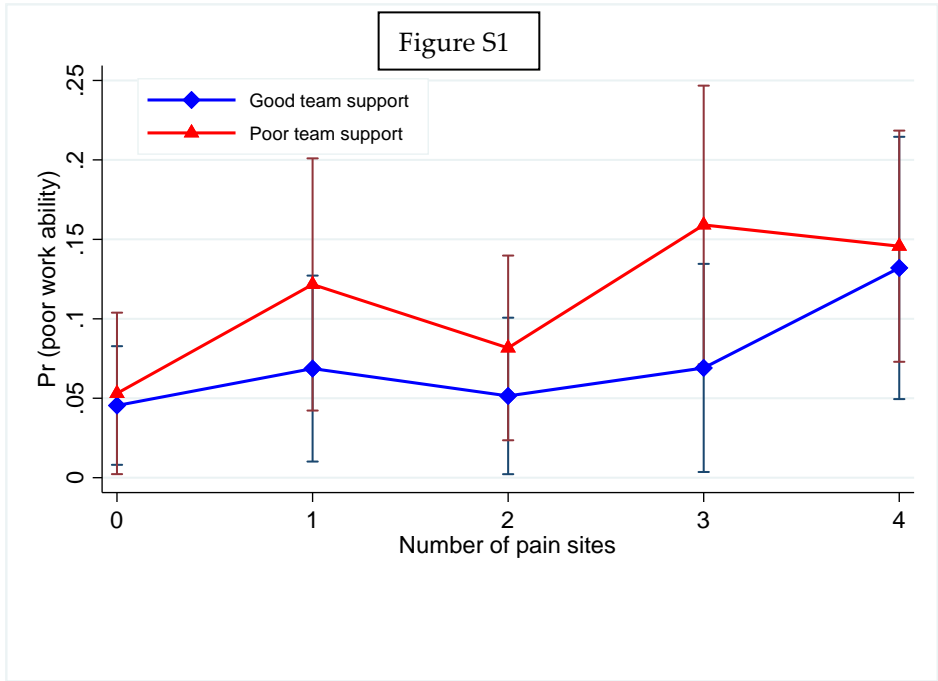

**Figure S1:** Predictive probability of trajectory of poor work ability due to number of pain sites and team support. Predictive margins with their 95% CIs.

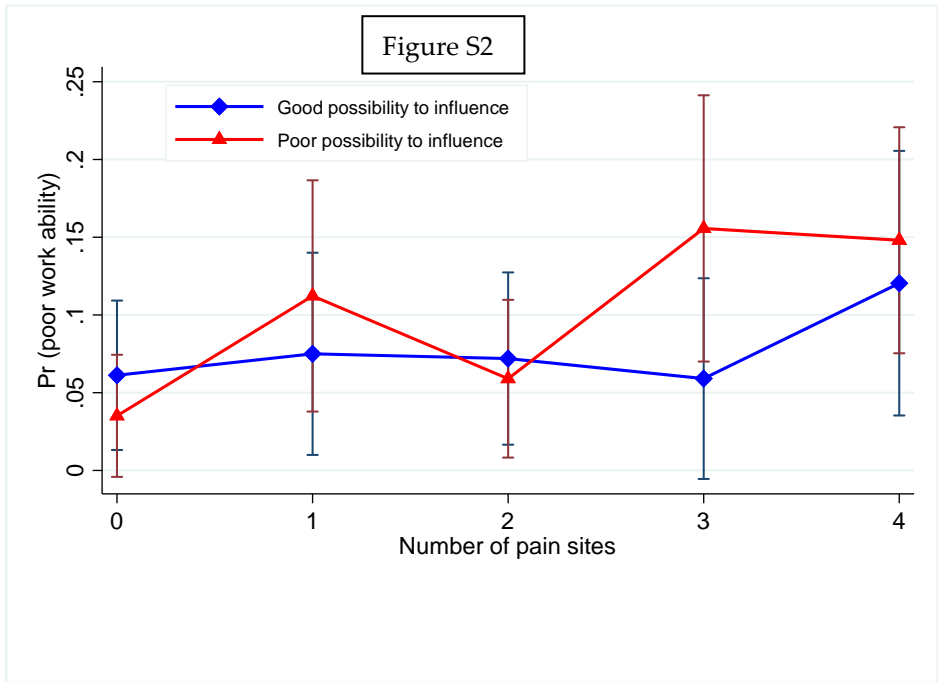

**Figure S2:** Probability of poor work ability pathway due to number of pain sites and possibility to influence at work. Predictive margins with 95% CIs.

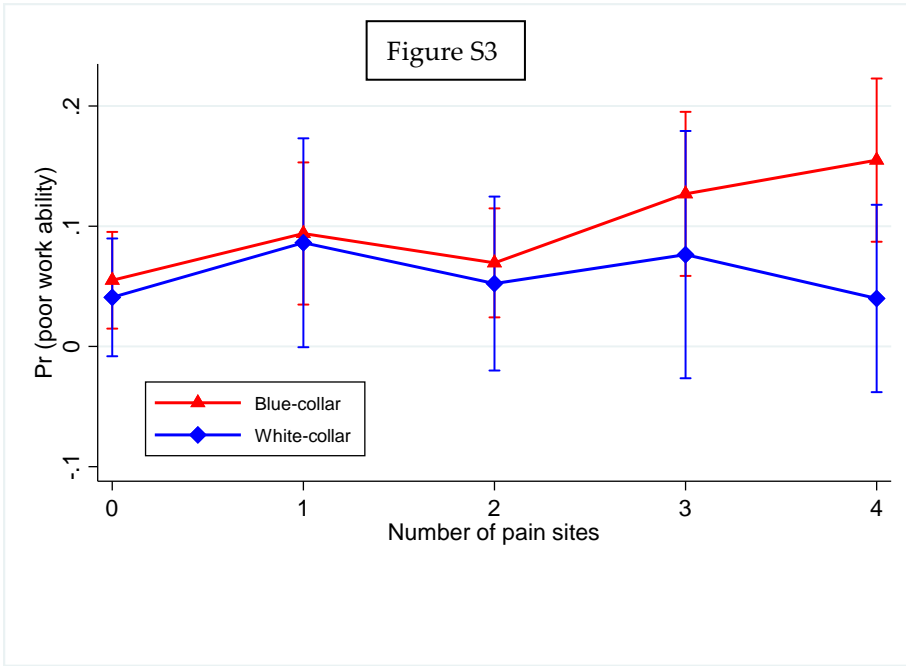

**Figure S3:** Probability of a poor work ability pathway due to number of pain sites and occupational class. Predictive margins with 95% CIs.
